# Supplementary material for: Arginine, Transsulfuration, and Folic Acid Pathway Metabolomics in Chronic Obstructive Pulmonary Disease: A Systematic Review and Meta-Analysis
Source: Preprints.org preprint supplement (doi:10.20944/preprints202308.0065.v1), 2023-08-01
Supplement: Supplementary file 3 [file Supplementary_Table_S3.docx]

**Supplementary Table 3.** The Joanna Briggs Institute critical appraisal checklist.

| **Study** | **Were the criteria for inclusion clearly defined?** | **Were the subjects and the setting described in detail?** | **Was the exposure measured in a valid and reliable way?** | **Were objective, standard criteria used for measurement of the condition?** | **Were confounding factors identified?** | **Were strategies to deal with confounding factors stated?** | **Were the outcomes measured in a valid and reliable way?** | **Was appropriate statistical analysis used?** | **Risk of bias** |
| --- | --- | --- | --- | --- | --- | --- | --- | --- | --- |
| Pow EM [1] | Yes | Yes | Yes | Yes | Yes | Yes | Yes | Yes | Low |
| Andersson A [2] | Yes | Yes | Yes | Yes | Yes | Yes | Yes | Yes | Low |
| Yoneda T [3] | Yes | Yes | Yes | Yes | No | No | Yes | Yes | Low |
| Kai S [4] | Yes | Yes | Yes | Yes | No | No | Yes | Yes | Low |
| Seemungal TAR [5] | Yes | Yes | Yes | Yes | Yes | Yes | Yes | Yes | Low |
| Abdallah GM [6] | Yes | Yes | Yes | Yes | No | No | Yes | Yes | Low |
| Fimognari FL [7] | Yes | Yes | Yes | Yes | Yes | Yes | Yes | Yes | Low |
| Kahn NA [8] | Yes | Yes | Yes | Yes | No | No | Yes | Yes | Low |
| Ruzsics I [9] | Yes | Yes | Yes | Yes | Yes | Yes | Yes | Yes | Low |
| Zinellu A [10] | Yes | Yes | Yes | Yes | Yes | Yes | Yes | Yes | Low |
| Aydin M [11] | Yes | Yes | Yes | Yes | Yes | Yes | Yes | Yes | Low |
| Costanzo L [12] | Yes | Yes | Yes | Yes | Yes | Yes | Yes | Yes | Low |
| Urban MH [13] | Yes | Yes | Yes | Yes | Yes | Yes | Yes | Yes | Low |
| Lin CH [14] | Yes | Yes | Yes | Yes | Yes | Yes | Yes | Yes | Low |
| Moayyedkazemi A [15] | Yes | Yes | Yes | Yes | No | No | Yes | Yes | Low |
| Telo S [16] | Yes | Yes | Yes | Yes | No | No | Yes | Yes | Low |
| Csoma B [17] | Yes | Yes | Yes | Yes | No | No | Yes | Yes | Low |
| Kuo WK [18] | Yes | Yes | Yes | Yes | Yes | Yes | Yes | Yes | Low |
| Wei B [19] | Yes | Yes | Yes | Yes | No | No | Yes | Yes | Low |
| Yu T [20] | Yes | Yes | Yes | Yes | No | No | Yes | Yes | Low |
| Zinellu [21] | Yes | Yes | Yes | Yes | Yes | Yes | Yes | Yes | Low |

**References**

1. Pouw, E.M.; Schols, A.M.; Deutz, N.E.; Wouters, E.F. Plasma and muscle amino acid levels in relation to resting energy expenditure and inflammation in stable chronic obstructive pulmonary disease. *Am J Respir Crit Care Med* **1998**, *158*, 797-801, doi:10.1164/ajrccm.158.3.9708097.

2. Andersson, A.; Ankerst, J.; Lindgren, A.; Larsson, K.; Hultberg, B. Hyperhomocysteinemia and changed plasma thiol redox status in chronic obstructive pulmonary disease. *Clin Chem Lab Med* **2001**, *39*, 229-233, doi:10.1515/CCLM.2001.036.

3. Yoneda, T.; Yoshikawa, M.; Fu, A.; Tsukaguchi, K.; Okamoto, Y.; Takenaka, H. Plasma levels of amino acids and hypermetabolism in patients with chronic obstructive pulmonary disease. *Nutrition* **2001**, *17*, 95-99, doi:10.1016/s0899-9007(00)00509-8.

4. Kai, S.; Nomura, A.; Morishima, Y.; Ishii, Y.; Sakamoto, T.; Hegab, A.E.; Sekizawa, K. The effect of smoking-related hyperhomocysteinemia on spirometric declines in chronic obstructive pulmonary disease in elderly Japanese. *Arch Gerontol Geriatr* **2006**, *42*, 117-124, doi:10.1016/j.archger.2005.06.003.

5. Seemungal, T.A.; Lun, J.C.; Davis, G.; Neblett, C.; Chinyepi, N.; Dookhan, C.; Drakes, S.; Mandeville, E.; Nana, F.; Setlhake, S.; et al. Plasma homocysteine is elevated in COPD patients and is related to COPD severity. *Int J Chron Obstruct Pulmon Dis* **2007**, *2*, 313-321, doi:10.2147/copd.s2147.

6. Abdallah, G.M.; Abdullah, A.; Omran, G.A.; Mariee, A.D. Serum Homocystein Level In COPD Patients: Possible Beneficial Effect Of Antioxidants. *Res J Med Med Sci* **2009**, *4*, 306-310.

7. Fimognari, F.L.; Loffredo, L.; Di Simone, S.; Sampietro, F.; Pastorelli, R.; Monaldo, M.; Violi, F.; D'Angelo, A. Hyperhomocysteinaemia and poor vitamin B status in chronic obstructive pulmonary disease. *Nutr Metab Cardiovasc Dis* **2009**, *19*, 654-659, doi:10.1016/j.numecd.2008.12.006.

8. Khan, N.A.; Saini, H.; Mawari, G.; Kumar, S.; Hira, H.S.; Daga, M.K. The Effect of Folic Acid Supplementation on Hyperhomocysteinemia and Pulmonary Function Parameters in Chronic Obstructive Pulmonary Disease: A Pilot Study. *J Clin Diagn Res* **2016**, *10*, OC17-OC21, doi:10.7860/JCDR/2016/21322.8927.

9. Ruzsics, I.; Nagy, L.; Keki, S.; Sarosi, V.; Illes, B.; Illes, Z.; Horvath, I.; Bogar, L.; Molnar, T. L-Arginine Pathway in COPD Patients with Acute Exacerbation: A New Potential Biomarker. *COPD* **2016**, *13*, 139-145, doi:10.3109/15412555.2015.1045973.

10. Zinellu, A.; Fois, A.G.; Sotgia, S.; Sotgiu, E.; Zinellu, E.; Bifulco, F.; Mangoni, A.A.; Pirina, P.; Carru, C. Arginines Plasma Concentration and Oxidative Stress in Mild to Moderate COPD. *PLoS One* **2016**, *11*, e0160237, doi:10.1371/journal.pone.0160237.

11. Aydin, M.; Altintas, N.; Cem Mutlu, L.; Bilir, B.; Oran, M.; Tulubas, F.; Topcu, B.; Tayfur, I.; Kucukyalcin, V.; Kaplan, G.; et al. Asymmetric dimethylarginine contributes to airway nitric oxide deficiency in patients with COPD. *Clin Respir J* **2017**, *11*, 318-327, doi:10.1111/crj.12337.

12. Costanzo, L.; Pedone, C.; Battistoni, F.; Chiurco, D.; Santangelo, S.; Antonelli-Incalzi, R. Relationship between FEV(1) and arterial stiffness in elderly people with chronic obstructive pulmonary disease. *Aging Clin Exp Res* **2017**, *29*, 157-164, doi:10.1007/s40520-016-0560-3.

13. Urban, M.H.; Eickhoff, P.; Funk, G.C.; Burghuber, O.C.; Wolzt, M.; Valipour, A. Increased brachial intima-media thickness is associated with circulating levels of asymmetric dimethylarginine in patients with COPD. *Int J Chron Obstruct Pulmon Dis* **2017**, *12*, 169-176, doi:10.2147/COPD.S118596.

14. Lin, C.H.; Chen, K.H.; Chen, C.M.; Chang, C.H.; Huang, T.J.; Lin, C.H. Risk factors for osteoporosis in male patients with chronic obstructive pulmonary disease in Taiwan. *PeerJ* **2018**, *6*, e4232, doi:10.7717/peerj.4232.

15. Moayyedkazemi, A.; Rahimirad, M. Evaluating the Serum Homocysteine Level in the Patients with Chronic Obstructive Pulmonary Disease and its Correlation with Severity of the Disease. *J Res Med Dent Sci* **2018**, *6*.

16. Telo, S.; Kirkil, G.; Kuluozturk, M.; Balin, M.; Deveci, F. Can ADMA play a role in determining pulmonary hypertension related to chronic obstructive pulmonary disease? *Clin Respir J* **2018**, *12*, 1433-1438, doi:10.1111/crj.12675.

17. Csoma, B.; Bikov, A.; Nagy, L.; Toth, B.; Tabi, T.; Szucs, G.; Komlosi, Z.I.; Muller, V.; Losonczy, G.; Lazar, Z. Dysregulation of the endothelial nitric oxide pathway is associated with airway inflammation in COPD. *Respir Res* **2019**, *20*, 156, doi:10.1186/s12931-019-1133-8.

18. Kuo, W.K.; Liu, Y.C.; Chu, C.M.; Hua, C.C.; Huang, C.Y.; Liu, M.H.; Wang, C.H. Amino Acid-Based Metabolic Indexes Identify Patients With Chronic Obstructive Pulmonary Disease And Further Discriminates Patients In Advanced BODE Stages. *Int J Chron Obstruct Pulmon Dis* **2019**, *14*, 2257-2266, doi:10.2147/COPD.S220557.

19. Wei, B.; Tian, T.; Liu, Y.; Li, C. The diagnostic value of homocysteine for the occurrence and acute progression of chronic obstructive pulmonary disease. *BMC Pulm Med* **2020**, *20*, 237, doi:10.1186/s12890-020-01265-w.

20. Yu, T.; Niu, W.; Niu, H.; Duan, R.; Dong, F.; Yang, T. Chitinase 3-like 1 polymorphisms and risk of chronic obstructive pulmonary disease and asthma in a Chinese population. *J Gene Med* **2020**, *22*, e3208, doi:10.1002/jgm.3208.

21. Zinellu, A.; Zinellu, E.; Sotgiu, E.; Fois, A.G.; Paliogiannis, P.; Scano, V.; Piras, B.; Sotgia, S.; Mangoni, A.A.; Carru, C.; et al. Systemic transsulfuration pathway thiol concentrations in chronic obstructive pulmonary disease patients. *Eur J Clin Invest* **2020**, e13267, doi:10.1111/eci.13267.
